# Supplementary material for: Polarization enhancement of microwave absorption by increasing aspect ratio of ellipsoidal nanorattles with Fe3O4 cores and hierarchical CuSiO3 shells
Source: Royal Society of Chemistry journal article supplement (doi:10.1039/c4nr00158c), 2014-01-01
Supplement: c4nr00158c1.pdf [file c4nr00158c1.pdf]

## Supporting information

### **Polarization Enhancement of Microwave Absorption by Increasing Aspect Ratio of Ellipsoidal Nanorattles with Fe<sub>3</sub>O<sub>4</sub> Cores and Hierarchical CuSiO<sub>3</sub> Shells**

Junjie Xu<sup>#,†</sup>, Jiwei Liu<sup>#,†,§</sup>, Renchao Che<sup>\*,†</sup>, Chongyun Liang<sup>†</sup>, Maosheng Cao<sup>‡</sup>, Yong Li<sup>‡</sup>, Zhengwang Liu<sup>†</sup>

*<sup>†</sup>Department of Materials Science and Laboratory of Advanced Materials, Fudan University, Shanghai 200438, China, <sup>‡</sup>School of Materials Science and Engineering, Beijing Institute of Technology, Beijing 100081, China, <sup>§</sup>National Institute for Materials Science (NIMS), Sengen 1-2-1, Tsukuba, Ibaraki 305-0047, Japan*

---

<sup>#</sup>These authors contributed equally.

Address correspondence to rcche@fudan.edu.cn

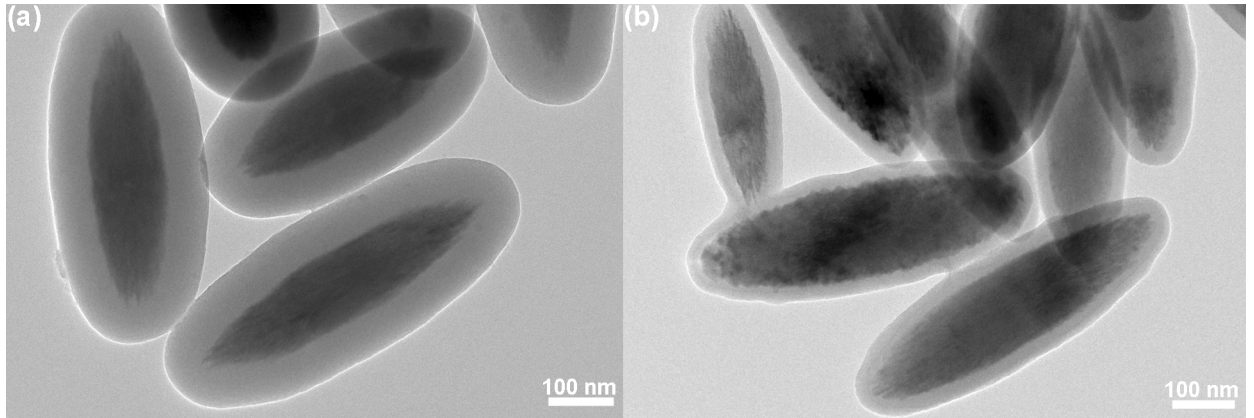

**Figure S-1** TEM images of the  $\alpha\text{-Fe}_2\text{O}_3\text{@SiO}_2$  nanopindles with different  $\text{SiO}_2$  layer thicknesses: (a)  $\sim 60$  nm and (b)  $\sim 27$  nm.

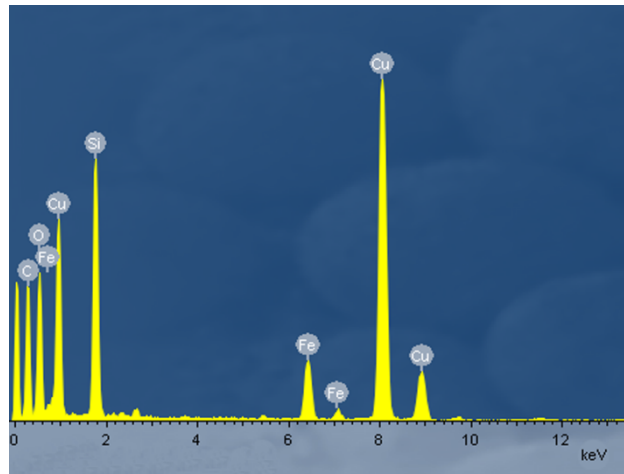

**Figure S-2** EDS pattern of the  $\text{Fe}_3\text{O}_4\text{@CuSilicate}$  nanorattles.

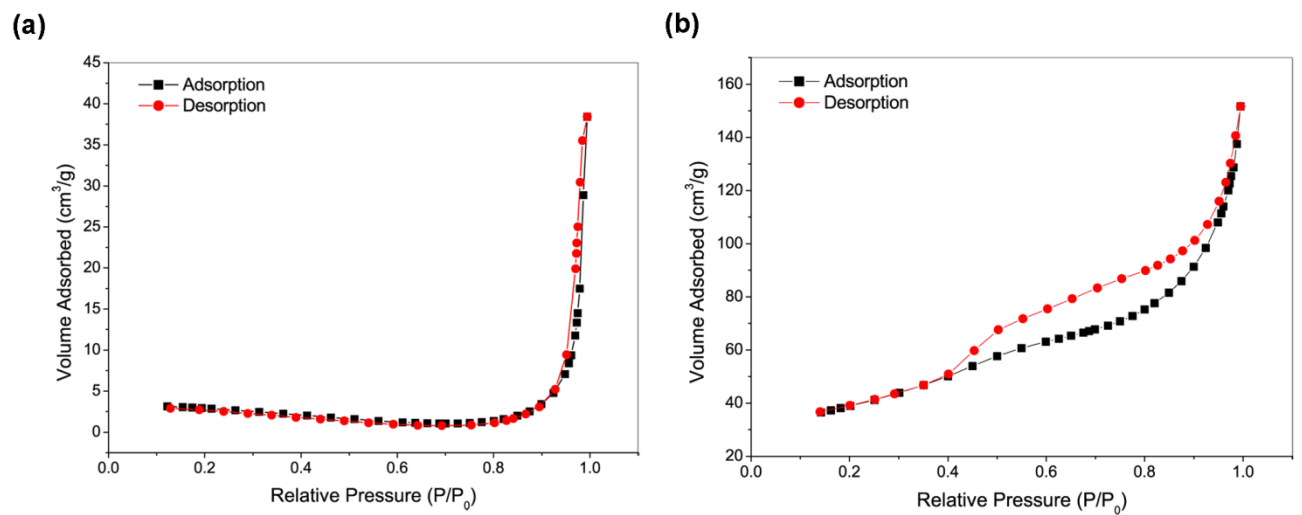

**Figure S-3**  $\text{N}_2$  adsorption-desorption isotherms of the  $\alpha\text{-Fe}_2\text{O}_3$  nanopindles (a) and the  $\text{Fe}_3\text{O}_4\text{@CuSilicate}$  nanorattles (b).

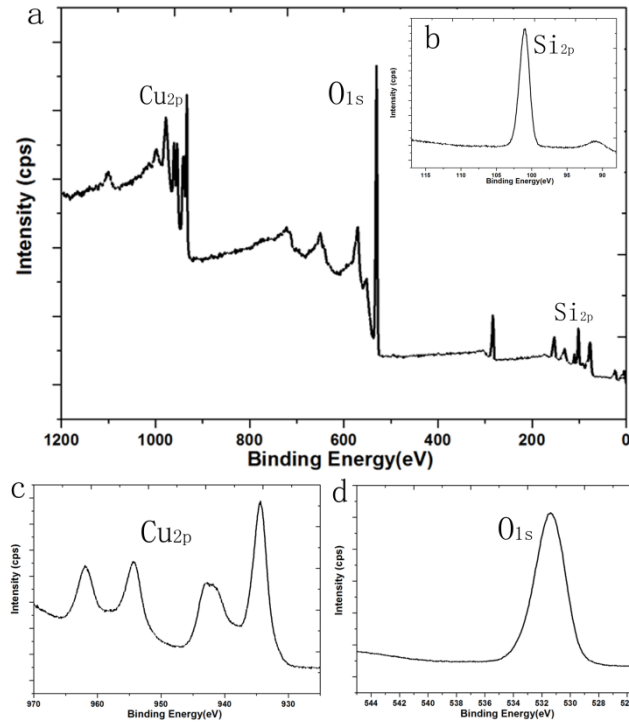

Figure S-4 XPS spectrum of MCM-5: (a) XPS elemental wide scanning spectrum; (b) spectrum of binding energy of electron in the 2p orbital of Si; (c) spectrum of binding energy of an electron in the 2p orbital of Cu; (d) spectrum of binding energy of an electron in the 1s orbital of O.

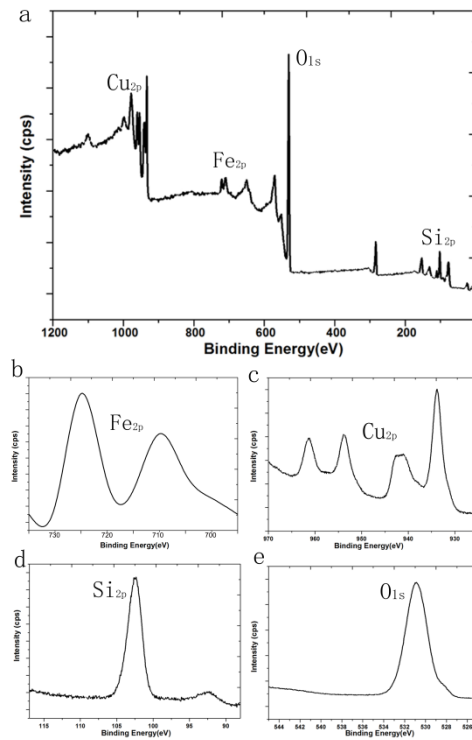

Figure S-5 XPS spectrum of the mixture of Fe<sub>3</sub>O<sub>4</sub> and copper silicate: (a) XPS elemental wide scanning spectrum; (b) spectrum of binding energy of electron in the 2p orbital of Fe; (c) spectrum of binding energy of an electron in the 2p orbital of Cu; (d) spectrum of binding energy of electron in the 2p orbital of Si; (e) spectrum of binding energy of an electron in the 1s orbital of O.

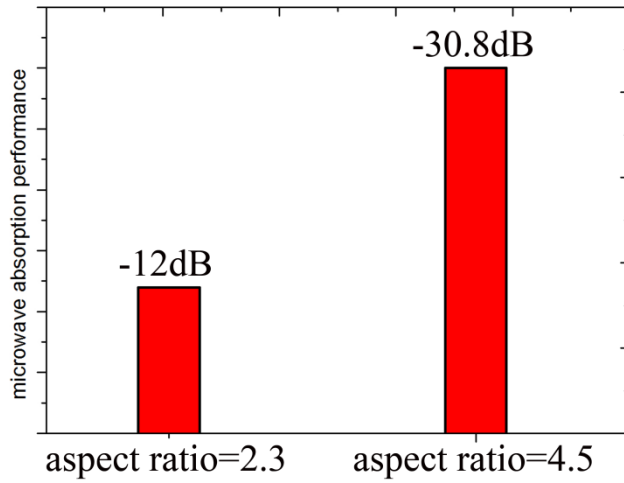

Figure S-6 The microwave absorption performance of  $\text{Fe}_3\text{O}_4@ \text{CuSilicate}$  nanorattles with different aspect ratio

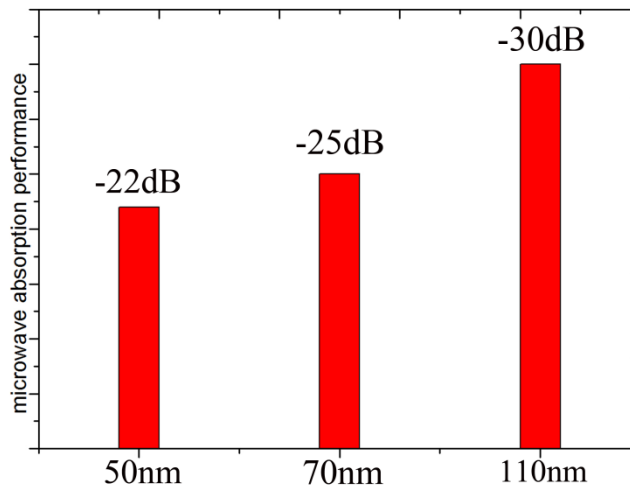

Figure S-7 The microwave absorption performance of  $\text{Fe}_3\text{O}_4@ \text{CuSilicate}$  nanorattles with different shell thickness

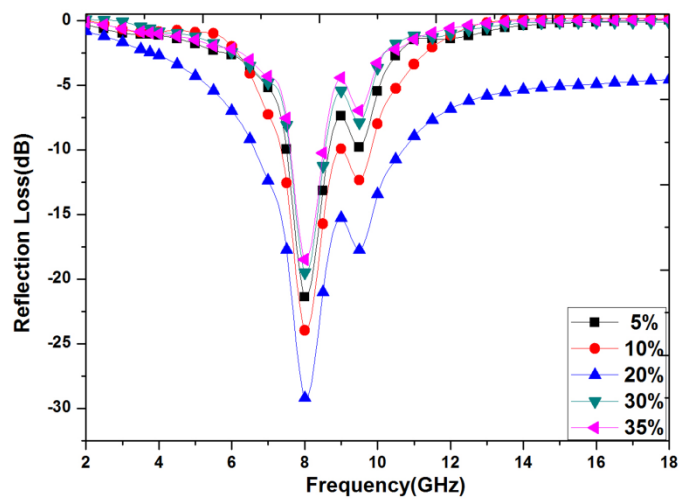

Figure S-8 Reflection loss of MCM-5 with different weight percent of nanoparticles.
